# Supplementary material for: Comparative Analysis of Label-Free and 8-Plex iTRAQ Approach for Quantitative Tissue Proteomic Analysis
Source: PLoS One. 2015 Sep 2;10(9):e0137048. doi: 10.1371/journal.pone.0137048 (PMC4557910; doi:10.1371/journal.pone.0137048)
Supplement: S6 Table — The biological reliability of protein identifications was evaluated based on the data collected in proteomic (Human Protein Atlas [30], ProteomicsDB [31]) and gene expression (Bgee Database [32]) databases. Additionally, credibility of the detected changes was assessed through the comparison of mRNA expression in non-muscle invasive (pTa) vs. muscle invasive BC (pTa) [33], BCa cancer vs. normal tissue [35] and high grade vs. low grade BCa cancer [36]. (-) This protein-coding gene was not found as differentially expressed in presented studies. (‡) Proteins characterized by the similar expression trend with the transcriptomic study. (XLSX) [file pone.0137048.s008.xlsx]

## Sheet: LFQ_p<0.05
	Uniprot ID	Gene Symbol	Protein Name	# Total Peptides	pT2+ vs. pTa (Direction)	Regulation trend in pT2+ vs. pTa	p-value	Protein Level		mRNA level
								Human Protein Atlas [1]: Immunohistochemical analysis for urinary bladder and urothelial cancer tissue	ProteomicsDB [2]: Mass spectrometry-based data for Urinary bladder	Bgee Database [3]: Microarray expression data for Urinary bladder, Urothelial carcionma	Micrarray Data (GEO:GSE3167) [4]: Regulation trend in pT2+ vs. pTa	Literature: Regulation trend in Urothelial cancer vs. normal bladder tissue [5] and/or high grade vs. low grade urothelial cancer [6]
IDs overlapping with ITRAQ+fractionation, significant according to both approches	O75369	FLNB	Filamin-B	46	down	-2.65317	0.0170562	Expression detected	Expression detected	Expression detected	-	-
	O95336	PGLS	6-phosphogluconolactonase	7	down	-2.23522	0.0387075	Expression detected	Expression detected	Expression detected	-	-
	P15428	HPGD	15-hydroxyprostaglandin dehydrogenase [NAD(+)]	6	down	-8.05604	<0,01	Expression detected	Expression detected	Expression detected	Up-regulated	-
	P21266	GSTM3	Glutathione S-transferase Mu 3	17	down	-2.7235	0.0394991	Expression detected	Expression detected	Expression detected	-	-
	P08758‡	ANXA5	Annexin A5	13	up	1.85668	< 0,01	Expression detected	Expression detected	Expression detected	Up-regulated	-
	P11413	G6PD	Glucose-6-phosphate 1-dehydrogenase	3	up	6.32044	0.0177203	Expression detected	Expression detected	Expression detected	-	-
	P19971‡	TYMP	Thymidine phosphorylase	5	up	8.17213	< 0,01	Expression detected	Expression detected	Expression detected	Up-regulated	-
	P48735	IDH2	Isocitrate dehydrogenase [NADP], mitochondrial	16	up	1.37549	0.00760079	Expression detected	Expression detected	Expression detected	-	-
	P52209	PGD	6-phosphogluconate dehydrogenase, decarboxylating	13	up	1.83833	0.0386014	Expression detected	Expression detected	Expression detected	-	-
	Q14980	NUMA1	Nuclear mitotic apparatus protein 1	6	up	1.44682	0.0167699	Expression detected	Expression detected	Expression detected	Down-regulated	-
	O95994‡	AGR2	Anterior gradient protein 2 homolog	5	down	-9.41302	1.88034e-06	Expression detected	Expression detected	Expression detected	Down-regulated	-
	Q9UKM9	RALY	RNA-binding protein Raly	3	up	1.34304	0.0402999	Expression detected	Expression detected	Expression detected	-	-
IDs overlapping with ITRAQ+fractionation, significant only according to LFQ	O00264	PGRMC1	Membrane-associated progesterone receptor component 1	3	down	-1.70138	<0,01	Expression detected	Expression detected	Expression detected	-	-
	O00515	LAD1	Ladinin-1	3	down	-2.82673	0.014541	Expression detected	Expression detected	Expression detected	-	-
	O75083‡	WDR1	WD repeat-containing protein 1	11	down	-1.03424	0.0324692	Expression detected	Expression detected	Expression detected	Down-regulated	-
	O76070‡	SNCG	Gamma-synuclein	8	down	-2.52274	0.0415438	Expression detected	Expression detected	Expression detected	Down-regulated	-
	P00918	CA2	Carbonic anhydrase 2	5	down	-2.30413	0.00585031	Expression not detected	Expression detected	Expression detected	-	-
	P13798	APEH	Acylamino-acid-releasing enzyme	3	down	-1.57619	0.0433381	Expression detected	Expression detected	Expression detected	-	-
	P14854	COX6B1	Cytochrome c oxidase subunit 6B1	3	down	-2.16031	0.0172242	Expression detected	Expression detected	Expression detected	-	-
	P14927	UQCRB	Cytochrome b-c1 complex subunit 7	4	down	-1.90183	<0,01	Expression detected	Expression detected	Expression detected	-	-
	P18669	PGAM1	Phosphoglycerate mutase 1	11	down	-1.35577	0.0302946	Expression detected	Expression detected	Expression not detected	-	-
	P25815‡	S100P	Protein S100-P	5	down	-2.08886	0.0441115	Expression detected	Expression detected	Expression detected	Down-regulated	-
	P26447	S100A4	Protein S100-A4	5	down	-2.36062	0.0458034	Expression detected	Expression detected	Expression detected	-	-
	P30048	PRDX3	Thioredoxin-dependent peroxide reductase, mitochondrial	6	down	-0.87357	0.0118783	Expression detected	Expression detected	Expression detected	-	-
	P52895‡	AKR1C2	Aldo-keto reductase family 1 member C2	2	down	-2.6053	0.0375856	Expression detected	Expression detected	Expression detected	Down-regulated	-
	P78417	GSTO1	Glutathione S-transferase omega-1	7	down	-0.787199	0.0374399	Expression not detected	Expression detected	Expression detected	-	-
	Q96HE7	ERO1L	ERO1-like protein alpha	7	down	-2.3866	0.0328255	Expression detected	Expression detected	Expression detected	-	-
	Q9HAW8‡	UGT1A10	UDP-glucuronosyltransferase 1-10	3	down	-4.87738	<0,01	Data not available	Expression detected	Expression not detected	Data not available	Down-regulated [6]
	Q9UJ72‡	ANXA10	Annexin A10	2	down	-6.68893	<0,01	Expression detected	Expression detected	Expression detected	-	Down-regulated [6]
	P50570‡	DNM2	Dynamin-2	6	down	-1.05601	0.0404004	Expression detected	Expression detected	Expression detected	Down-regulated	-
	Q8WUM4	PDCD6IP	Programmed cell death 6-interacting protein	15	down	-1.08526	0.0468651	Expression detected	Expression detected	Expression detected	-	-
	Q96CX2‡	KCTD12	BTB/POZ domain-containing protein KCTD12	2	up	4.47081	0.00582141	Data not available	Expression detected	Expression detected	Up-regulated	-
	O43143	DHX15	Putative pre-mRNA-splicing factor ATP-dependent RNA helicase DHX15	4	up	1.64766	0.0193047	Expression detected	Expression detected	Expression detected	-	-
	O43175‡	PHGDH	D-3-phosphoglycerate dehydrogenase	8	up	6.4822	<0,01	Expression detected	Expression detected	Expression detected	-	Up-regulated [6]
	O60763	USO1	General vesicular transport factor p115	3	up	0.520361	0.0441049	Expression detected	Expression detected	Expression detected	-	-
	O75643‡	SNRNP200	U5 small nuclear ribonucleoprotein 200 kDa helicase	4	up	2.08425	0.0283727	Expression detected	Expression detected	Expression detected	Up-regulated	-
	O95373	IPO7	Importin-7	2	up	4.64394	0.00818486	Expression detected	Expression detected	Expression detected	-	-
	P01877	IGHA2	Ig alpha-2 chain C region	2	up	1.99853	0.0417554	Data not available	Expression detected	Data not available	Data not available	-
	P02786‡	TFRC	Transferrin receptor protein 1	7	up	4.38529	0.0153458	Expression detected	Expression detected	Expression detected	Up-regulated	-
	P02792‡	FTL	Ferritin light chain	3	up	4.94069	0.0309626	Expression detected	Expression detected	Data not available	Up-regulated	-
	P04083‡	ANXA1	Annexin A1	17	up	2.25135	0.0226049	Expression detected	Expression detected	Expression detected	Up-regulated	Up-regulated [6]
	P04844	RPN2	Dolichyl-diphosphooligosaccharide--protein glycosyltransferase subunit 2	6	up	1.22962	0.0153078	Expression detected	Expression detected	Expression detected	-	-
	P06702‡	S100A9	Protein S100-A9	4	up	5.06013	0.0211164	Expression detected	Expression detected	Expression detected	Up-regulated	-
	P07237	P4HB	Protein disulfide-isomerase	25	up	0.961926	0.0311711	Expression detected	Expression detected	Expression detected	-	-
	P08133‡	ANXA6	Annexin A6	14	up	2.05087	0.0468948	Expression detected	Expression detected	Expression detected	Up-regulated	-
	P08238	HSP90AB1	Heat shock protein HSP 90-beta	33	up	0.91516	0.0230353	Expression detected	Expression detected	Expression detected	Down-regulated
	P26038‡	MSN	Moesin	8	up	2.79573	<0,01	Expression detected	Expression detected	Expression detected	Up-regulated	-
	P28838‡	LAP3	Cytosol aminopeptidase	7	up	2.09882	0.0265181	Expression detected	Expression detected	Expression detected	Up-regulated	-
	P46781	RPS9	40S ribosomal protein S9	7	up	1.16963	0.0259841	Expression detected	Expression detected	Expression detected	Down-regulated	-
	P46940	IQGAP1	Ras GTPase-activating-like protein IQGAP1	43	up	1.22134	0.0183746	Expression detected	Expression detected	Expression detected	-	-
	P49915‡	GMPS	GMP synthase [glutamine-hydrolyzing]	3	up	2.75135	0.0161292	Expression detected	Expression detected	Expression detected	Up-regulated	-
	P61026	RAB10	Ras-related protein Rab-10	3	up	2.39399	0.0123651	Expression detected	Expression detected	Expression detected	Data not available	-
	P62269	RPS18	40S ribosomal protein S18	7	up	0.974	0.0331033	Expression detected	Expression detected	Data not available	-	-
	Q07666	KHDRBS1	KH domain-containing, RNA-binding, signal transduction-associated protein 1	4	up	0.62754	0.0223885	Expression detected	Expression detected	Expression detected	-	-
	Q15067	ACOX1	Peroxisomal acyl-coenzyme A oxidase 1	3	up	6.13304	0.00590243	Expression detected	Expression detected	Expression detected	Down-regulated	-
	Q7Z4W1	DCXR	L-xylulose reductase	2	up	3.85277	0.0117867	Expression detected	Expression detected	Expression detected	-	-
	Q8TCJ2	STT3B	Dolichyl-diphosphooligosaccharide--protein glycosyltransferase subunit STT3B	2	up	2.12874	0.035992	Expression not detected	Expression detected	Expression detected	Data not available	-
Unique IDs	O00584‡	RNASET2	Ribonuclease T2	2	down	-3.94465	0.027018	Expression detected	Expression detected	Expression detected	Down-regulated	-
	Q01469	FABP5	Fatty acid-binding protein, epidermal	5	down	-2.3059	0.0169297	Expression detected	Expression detected	Expression detected	-	Up-regulated [5]
	Q96C90	PPP1R14B	Protein phosphatase 1 regulatory subunit 14B	2	down	-2.55737	0.0279336	Expression detected	Expression detected	Expression not detected	-	-
	Q8NCW5	APOA1BP	NAD(P)H-hydrate epimerase	2	down	-1.40971	0.0460331	Expression detected	Expression detected	Expression detected	Data not available	-
	O43493‡	TGOLN2	Trans-Golgi network integral membrane protein 2	2	up	2.43013	0.0373724	Expression detected	Expression detected	Expression detected	Up-regulated	-
	O76021	RSL1D1	Ribosomal L1 domain-containing protein 1	3	up	2.80104	0.0101505	Expression detected	Expression not detected	Expression detected	-	-
	P05109‡	S100A8	Protein S100-A8	4	up	5.28162	0.0285894	Expression detected	Expression detected	Expression detected	Up-regulated	-
	P07585	DCN	Decorin	7	up	3.9673	0.027333	Expression detected	Expression detected	Expression detected	Up-regulated	Down-regulated [5]
	P12004‡	PCNA	Proliferating cell nuclear antigen	7	up	2.28392	0.0289661	Expression detected	Expression detected	Expression detected	Up-regulated	Up-regulated [5, 6]
	P25205‡	MCM3	DNA replication licensing factor MCM3	2	up	4.04731	<0,01	Expression detected	Expression not detected	Expression detected	-	Up-regulated [6]
	P36955‡	SERPINF1	Pigment epithelium-derived factor	2	up	5.16941	<0,01	Expression detected	Expression detected	Expression detected	Up-regulated	-
	P49321‡	NASP	Nuclear autoantigenic sperm protein	2	up	1.61388	0.0337614	Expression detected	Expression detected	Expression detected	Up-regulated	Up-regulated [6]
	P51149‡	RAB7A	Ras-related protein Rab-7a	11	up	0.889773	0.0436145	Expression detected	Expression detected	Expression detected	Up-regulated	-
	P53634‡	CTSC	Dipeptidyl peptidase 1 (Cathepsin C)	2	up	3.94291	0.00722779	Expression detected	Expression detected	Expression detected	Up-regulated	-
	P61204	ARF3	ADP-ribosylation factor 3	5	up	1.09134	0.0244948	Data not available	Expression detected	Data not available	-	-
	P68363‡	TUBA1B	Tubulin alpha-1B chain	13	up	0.785939	0.0298569	Expression detected	Expression detected	Expression detected	-	Up-regulated [6]
	Q14956‡	GPNMB	Transmembrane glycoprotein NMB	2	up	8.11377	<0,01	Expression detected	Expression detected	Expression detected	Up-regulated	-
	Q15691	MAPRE1	Microtubule-associated protein RP/EB family member 1	4	up	1.52354	0.00662969	Expression detected	Expression detected	Expression detected	-	-
	Q92734‡	TFG	Protein TFG	2	up	1.04558	0.00550911	Expression detected	Expression detected	Expression detected	Up-regulated	-
	Q96AG4‡	LRRC59	Leucine-rich repeat-containing protein 59	4	up	1.07255	0.0347216	Expression detected	Expression detected	Expression detected	Up-regulated	-
	References
[1]	Uhlen M, Bjorling E, Agaton C, Szigyarto CA, Amini B, Andersen E, et al. A human protein atlas for normal and cancer tissues based on antibody proteomics. Mol Cell Proteomics. 2005;4:1920-1932.
[2]	Wilhelm M, Schlegl J, Hahne H, Moghaddas Gholami A, Lieberenz M, Savitski MM, et al. Mass-spectrometry-based draft of the human proteome. Nature. 2014;509:582-587.
[3]	Bastian F, Parmentier G, Roux J, Moretti S, Laudet V. Bgee: Integrating and Comparing Heterogeneous Transcriptome Data Among Species. In: Bairoch A, Cohen-Boulakia S, Froidevaux C, editors. Data Integration in the Life Sciences. Berlin Heidelberg: Spinger; 2008. p. 124-131.
[4]	Dyrskjot L, Kruhoffer M, Thykjaer T, Marcussen N, Jensen JL, Moller K, et al. Gene expression in the urinary bladder: a common carcinoma in situ gene expression signature exists disregarding histopathological classification. Cancer Res. 2004;64:4040-4048.
[5]	Kawakami K, Enokida H, Tachiwada T, Gotanda T, Tsuneyoshi K, Kubo H, et al. Identification of differentially expressed genes in human bladder cancer through genome-wide gene expression profiling. Oncol Rep. 2006;16:521-531.
[6]	Liu Y, Noon AP, Aguiar Cabeza E, Shen J, Kuk C, Ilczynski C, et al. Next-generation RNA Sequencing of Archival Formalin-fixed Paraffin-embedded Urothelial Bladder Cancer. Eur Urol. 2014;66:982-986.

## Sheet: iTRAQ+fractionation_p<0.05
	UniprotID	Gene Symbol	Protein Name	#Peptides used for quantification	# Total Peptides	pT2+ vs. pTa (Direction)	Regulation trend in pT2+ vs. pTa	p-value	Protein level		mRNA level
									Human Protein Atlas [1]: Immunohistochemical analysis for urinary bladder and/or urothelial cancer tissue	ProteomicsDB [2]: Mass spectrometry-based data for Urinary bladder	Bgee Database [3]: Microarray expression data for Urinary bladder, Urothelial carcionma	Micrarray Data (GEO:GSE3167) [4]: Regulation trend in pT2+ vs. pTa	Literature: Regulation trend in Urothelial cancer vs. normal bladder tissue [5] and/or high grade vs. low grade urothelial cancer [6]
IDs overlapping with LFQ, significant according to both approches	O75369	FLNB	Filamin-B	24	36	down	-0.620005	0.017	Expression detected	Expression detected	Expression detected	-	-
	O95336	PGLS	6-phosphogluconolactonase	3	4	down	-0.662179	0.009	Expression detected	Expression detected	Expression detected	-	-
	P15428	HPGD	15-hydroxyprostaglandin dehydrogenase	4	6	down	-2.36068	0.041	Expression detected	Expression detected	Expression detected	Up-regulated	-
	P21266	GSTM3	Glutathione S-transferase Mu 3	7	8	down	-1.66549	0.016	Expression detected	Expression detected	Expression detected	-	-
	O95994‡	AGR2	Anterior gradient protein 2 homolog	3	3	down	-1.54673	0.048	Expression detected	Expression detected	Expression detected	Down-regulated	-
	P08758‡	ANXA5	Annexin A5	7	7	up	1.02413	0.043	Expression detected	Expression detected	Expression detected	Up-regulated	-
	P11413	G6PD	Glucose-6-phosphate 1-dehydrogenase	6	6	up	0.793355	0.039	Expression detected	Expression detected	Expression detected	-	-
	P19971‡	TYMP	Thymidine phosphorylase	1	4	up	1.58363	0.021	Expression detected	Expression detected	Expression detected	Up-regulated	-
	P48735	IDH2	Isocitrate dehydrogenase [NADP], mitochondrial	3	3	up	0.58168	0.029	Expression detected	Expression detected	Expression detected	-	-
	P52209	PGD	6-phosphogluconate dehydrogenase, decarboxylating	4	4	up	0.669588	0.021	Expression detected	Expression detected	Expression detected	-	-
	Q14980	NUMA1	Nuclear mitotic apparatus protein 1	11	14	up	0.274558	0.026	Expression detected	Expression detected	Expression detected	Down-regulated	-
	Q9UKM9	RALY	RNA-binding protein Raly	1	2	up	0.443185	0.025	Expression detected	Expression detected	Expression detected	-	-
IDs overlapping with LFQ, significant only according to iTRAQ+fractionation	O15145	ARPC3	Actin-related protein 2/3 complex subunit 3	3	3	down	-0.25475	0.043	Expression detected	Expression detected	Expression detected	Up-regulated	-
	O75608	LYPLA1	Acyl-protein thioesterase 1	2	2	down	-0.495552	0.009	Expression detected	Expression detected	Expression detected	-	-
	O95571	ETHE1	Persulfide dioxygenase ETHE1, mitochondrial	1	3	down	-0.928724	0.021	Expression detected	Expression detected	Expression detected	-	-
	P09211	GSTP1	Glutathione S-transferase P	3	3	down	-0.694826	0.03	Expression detected	Expression detected	Expression detected	-	-
	P22695	UQCRC2	Cytochrome b-c1 complex subunit 2, mitochondrial	4	4	down	-0.267963	0.008	Expression detected	Expression detected	Expression detected	-	-
	Q15847‡	ADIRF	Adipogenesis regulatory factor	3	3	down	-0.955203	0.039	Expression detected	Expression detected	Data not available	Down-regulated	-
	Q5SSJ5	HP1BP3	Heterochromatin protein 1-binding protein 3	3	3	down	-0.303155	0.046	Expression detected	Expression detected	Expression detected	-	-
	Q6NVY1	HIBCH	3-hydroxyisobutyryl-CoA hydrolase, mitochondrial	2	2	down	-0.872797	0.03	Expression detected	Expression detected	Expression detected	-	-
	Q9UHQ9	CYB5R1	NADH-cytochrome b5 reductase 1	4	5	down	-0.929252	0.039	Expression detected	Expression detected	Expression detected	-	-
	O60506‡	SYNCRIP	Heterogeneous nuclear ribonucleoprotein Q	2	2	up	0.942093	0.014	Expression detected	Expression detected	Expression detected	Up-regulated	-
	O75131‡	CPNE3	Copine-3	4	6	up	0.473361	0.039	Expression detected	Expression detected	Expression detected	-	Up-regulated [5]
	P41091	EIF2S3	Eukaryotic translation initiation factor 2 subunit 3	1	2	up	0.522899	0.03	Expression detected	Expression detected	Expression detected	-	-
	P16403	HIST1H1C	Histone H1.2	2	2	up	0.676342	0.044	Expression detected	Expression detected	Expression detected	-	-
	Q9Y230	RUVBL2	RuvB-like 2	4	4	up	0.197333	0.022	Expression detected	Expression detected	Expression detected	-	-
Unique IDs	P16144‡	ITGB4	Integrin beta-4	1	2	down	-0.718024	0.017	Expression detected	Expression detected	Expression detected	Down-regulated	-
	P17936	IGFBP3	Insulin-like growth factor-binding protein 3	2	2	down	-0.91219	0.008	Expression detected	Data not available	Expression detected	-	-
	P30533‡	LRPAP1	Alpha-2-macroglobulin receptor-associated protein	1	2	down	-0.576365	0.048	Expression detected	Expression detected	Expression detected	Down-regulated	-
	P35573	AGL	Glycogen debranching enzyme	3	3	down	-0.57312	0.029	Expression detected	Expression detected	Expression detected	-	-
	P53990‡	IST1	IST1 homolog	2	5	down	-0.946512	0.036	Expression detected	Expression detected	Expression detected	Down-regulated	-
	P68402	PAFAH1B2	Platelet-activating factor acetylhydrolase IB subunit beta	3	3	down	-1.09473	0.02	Expression detected	Expression detected	Expression detected	-	-
	Q14376	GALE	UDP-glucose 4-epimerase	2	2	down	-1.06133	0.017	Expression detected	Expression detected	Expression detected	-	-
	Q8ND30‡	PPFIBP2	Liprin-beta-2	2	2	down	-0.600523	0.024	Expression detected	Data not available	Expression detected	Down-regulated	-
	Q9UBI6	GNG12	Guanine nucleotide-binding protein G	2	2	down	-0.716365	0.038	Expression detected	Expression detected	Expression detected	-	-
	P48506	GCLC	Glutamate--cysteine ligase catalytic subunit	3	3	down	-0.59607	0.024	Expression detected	Expression detected	Expression detected	-	-
	P09543	CNP	2',3'-cyclic-nucleotide 3'-phosphodiesterase	2	2	up	0.468822	0.046	Expression not detected	Expression detected	Data not available	-	-
	P10644‡	PRKAR1A	cAMP-dependent protein kinase type I-alpha regulatory subunit	2	2	up	1.1233	0.004	Expression detected	Expression detected	Expression detected	Up-regulated	-
	P42285	SKIV2L2	Superkiller viralicidic activity 2-like 2	2	2	up	0.454922	0.044	Expression detected	Expression detected	Expression detected	Down-regulated	-
	P49736‡	MCM2	DNA replication licensing factor MCM2	5	5	up	0.725813	0.019	Expression detected	Expression detected	Expression detected	Up-regulated	Up-regulated [6]
	P51570	GALK1	Galactokinase	1	2	up	0.852374	0.017	Expression detected	Expression detected	Expression not detected	-	-
	P61221	ABCE1	ATP-binding cassette sub-family E member 1	2	2	up	0.617284	0.028	Expression detected	Expression detected	Expression detected	-	-
	P62310‡	LSM3	U6 snRNA-associated Sm-like protein LSm3	1	2	up	0.424022	0.046	Expression detected	Data not available	Expression detected	-	Up-regulated [5]
	Q14566‡	MCM6	DNA replication licensing factor MCM6	1	3	up	1.12505	<0,01	Expression detected	Expression detected	Expression detected	Up-regulated	Up-regulated [6]
	Q9NVP1‡	DDX18	ATP-dependent RNA helicase DDX18	2	2	up	0.915482	0.027	Expression detected	Expression detected	Expression detected	Up-regulated	-
	References
[1]	Uhlen M, Bjorling E, Agaton C, Szigyarto CA, Amini B, Andersen E, et al. A human protein atlas for normal and cancer tissues based on antibody proteomics. Mol Cell Proteomics. 2005;4:1920-1932.
[2]	Wilhelm M, Schlegl J, Hahne H, Moghaddas Gholami A, Lieberenz M, Savitski MM, et al. Mass-spectrometry-based draft of the human proteome. Nature. 2014;509:582-587.
[3]	Bastian F, Parmentier G, Roux J, Moretti S, Laudet V. Bgee: Integrating and Comparing Heterogeneous Transcriptome Data Among Species. In: Bairoch A, Cohen-Boulakia S, Froidevaux C, editors. Data Integration in the Life Sciences. Berlin Heidelberg: Spinger; 2008. p. 124-131.
[4]	Dyrskjot L, Kruhoffer M, Thykjaer T, Marcussen N, Jensen JL, Moller K, et al. Gene expression in the urinary bladder: a common carcinoma in situ gene expression signature exists disregarding histopathological classification. Cancer Res. 2004;64:4040-4048.
[5]	Kawakami K, Enokida H, Tachiwada T, Gotanda T, Tsuneyoshi K, Kubo H, et al. Identification of differentially expressed genes in human bladder cancer through genome-wide gene expression profiling. Oncol Rep. 2006;16:521-531.
[6]	Liu Y, Noon AP, Aguiar Cabeza E, Shen J, Kuk C, Ilczynski C, et al. Next-generation RNA Sequencing of Archival Formalin-fixed Paraffin-embedded Urothelial Bladder Cancer. Eur Urol. 2014;66:982-986.
